# Supplementary material for: Controlling cell adhesion on polyurethanes
Source: Royal Society of Chemistry journal article supplement (doi:10.1039/b714947f), 2007-11-14
Supplement: b714947f.pdf [file b714947f.pdf]

# CONTROLLING CELL ADHESION ON POLYURETHANES

T. Joseph Dennes and Jeffrey Schwartz\*

*Department of Chemistry, Princeton University, Princeton, NJ 08544*

E-mail: [jschwartz@princeton.edu](mailto:jschwartz@princeton.edu)

## **Supporting Information**

Hydrolysis plots for (a) **12b** and (b) **13b**, and (c) calculation of sample surface loading.

(a) Hydrolysis of DANSYL-Cys from **12b** measured for a surface area of 5 cm<sup>2</sup>.

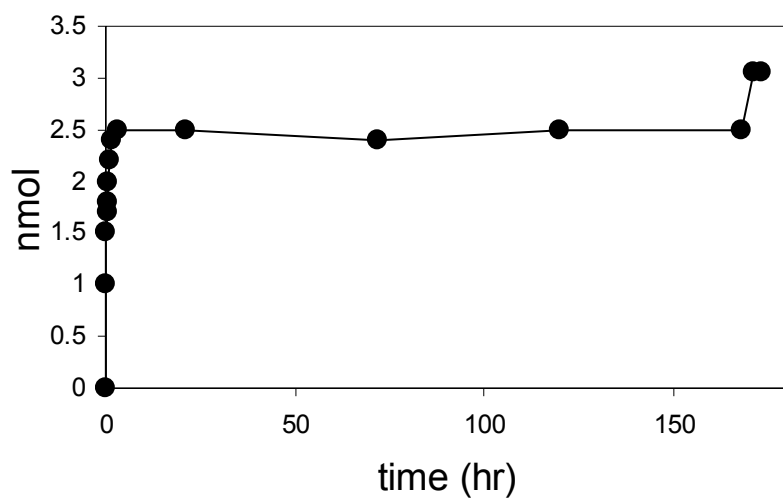

(b) Hydrolysis of DANSYL-Cys from **13b** measured for a surface area of 3 cm<sup>2</sup>. No increase in dissolved DANSYL-Cys was observed after 24 hours compared to control. The increase in the amount of fluorescent material after 150 h is due to release at pH 12.5 and is a measure of surface bound DANSYL-Cys at pH 7.5.

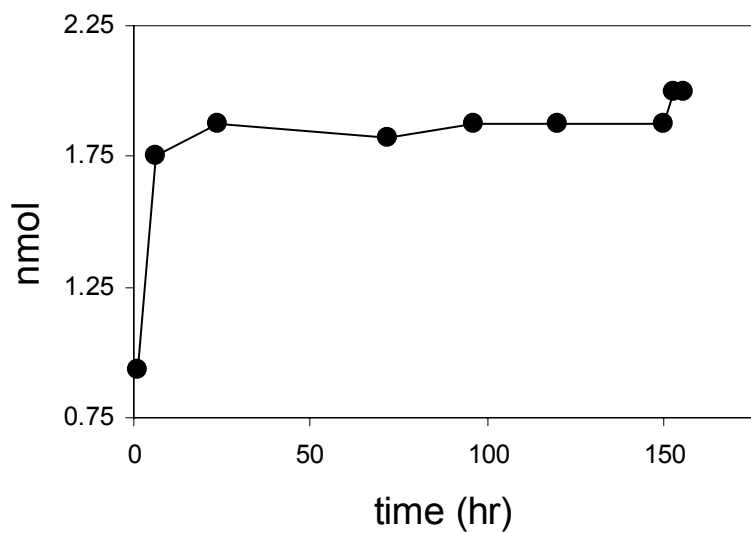

Sample calculation of spatial surface loading from molecular “footprint” and molar surface loading:

$$110 \text{ pmol RGDC/cm}^2 = 6.6 \times 10^{13} \text{ molecules RGDC/cm}^2$$

Assuming a  $40 \text{ \AA}^2$  “footprint” for an RGDC molecule, spatial coverage is  $0.26 \text{ cm}^2/\text{cm}^2$ ,  
or approximately 25 %.
